# Supplementary material for: Putative archaeal viruses from the mesopelagic ocean
Source: PeerJ. 2017 Jun 15;5:e3428. doi: 10.7717/peerj.3428 (PMC5474096; doi:10.7717/peerj.3428)
Supplement: Data S5 [file peerj-05-3428-s009.csv]

Station	Temperature (deg C)	Salinity (PSU)	Oxygen umol/kg)	Chla (FU)	Depth (m)	Feature
6	25.3509	34.621	166.987	0.391	30	Surface/Upper DCM
6	14.762	34.7366	3.001	0.672	85	Upper oxycline/Lower DCM
6	14.1345	34.7749	2.839	0.452	100	Upper oxycline
6	10.6701	34.704	2.22	0.0977	300	OMZ core
6	4.6025	34.5426	8.648	0.11	1000	Lower Oxycline
2	23.8483	34.6597	209.824	0.134	30	Surface/Mixed layer
2	18.4872	34.4206	220.5	0.781	60	Surface/DCM
2	13.394	34.7106	7.024	0.11	130	Upper oxycline
2	10.5395	34.6763	1.864	0.11	300	OMZ core
2	4.3772	34.5392	10.897	0.11	1000	Lower Oxycline
Sup Table 1.Temperature, Salinity, Oxygen concentration, Chlorophyll a concentration, and Depth measurements for each sampling effort in the ETNP. Both stations 2 and 6 are relatively similar in measured environmental features with the exception that station 6 is positioned over the continental shelf and has an oxycline well within the photic zone, while station 2 is roughly 450km to the west in …
